# Supplementary material for: Prediction of mortality in adult patients with sepsis using six biomarkers: a systematic review and meta-analysis
Source: Springer Nature journal article supplement (doi:10.1186/s13613-019-0600-1), 2019-11-08

## **Additional file 1 – Literature search strategy**

Databases searched:

- MEDLINE
- PubMed
- EMBASE
- Cochrane Library

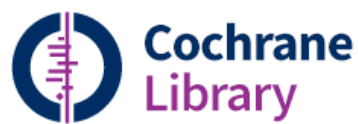

Trusted evidence.  
Informed decisions.  
Better health.

[Log in / Register](#)

[Search](#)      [Search Manager](#)      [Medical Terms \(MeSH\)](#)      [Browse](#)

To search an exact word(s) use quotation marks, e.g. "hospital" finds hospital; hospital (no quotation marks) finds hospital and hospitals; pay finds paid, pays, paying, payed)

[View fewer lines](#)

|                          |                          |    |  |                                     |        |
|--------------------------|--------------------------|----|--|-------------------------------------|--------|
| <input type="checkbox"/> | <input type="checkbox"/> | #1 |  | <input type="checkbox"/>            | 6514   |
| <input type="checkbox"/> | <input type="checkbox"/> | #2 |  | <input type="checkbox"/>            | 50779  |
| <input type="checkbox"/> | <input type="checkbox"/> | #3 |  | <input type="checkbox"/>            | 139763 |
| <input type="checkbox"/> | <input type="checkbox"/> | #4 |  | <input type="checkbox"/>            | 157295 |
| <input type="checkbox"/> | <input type="checkbox"/> | #5 |  | <input type="checkbox"/>            | 212    |
| <input type="checkbox"/> | <input type="checkbox"/> | #6 |  | <input checked="" type="checkbox"/> | N/A    |

[Search Help](#)

[Highlight orphan lines](#)

**Save strategy**

Strategy Name

Comments

All Results (212)

**Cochrane Central Register of Controlled Trials : Issue 9 of 12, September 2017**

- Cochrane Reviews (1)
  - All
  - Review
  - Protocol

- Other Reviews (0)
- Trials (211)
- Methods Studies (0)
- Technology Assessments (0)
- Economic Evaluations (0)
- Cochrane Groups (0)

- All
- Current Issue

There are **211** results from **1087263** records for your search on **#5 - #1 and #2 and #3 and #4** in **Trials** in the strategy currently being edited

Pages | | | | **201 - 211**      Sort by Date

[Select all](#)

**Prospective evaluation of a shortened regimen of treatment for acute osteomyelitis and septic arthritis in children**  
 Jagodzinski NA , Kanwar R , Graham K and Bache CE  
 Journal of pediatric orthopedics, 2009, 29(5), 518  
 Online Publication Date: 2012

**Hemofiltration does not influence early S-100B serum levels in septic shock patients receiving stress doses of hydrocortisone or placebo**  
 Mussack T , Briegel J , Schelling G and Jochum M  
 European journal of medical research, 2005, 10(1), 11  
 Online Publication Date: 2012

**Me** Methodology

## Embase Session Results (17 Oct 2017)

| No. | Query                                                                                                                                                                                                                                                                                                                                                                                                                                                                                                                                                                                                                                                                                                                                                                                                                                                                                                                                                                                                                                                                                                                                                                                                                                                                                                                                                                                                                                                                                                                                                                                                                                                                                                              | Results |
|-----|--------------------------------------------------------------------------------------------------------------------------------------------------------------------------------------------------------------------------------------------------------------------------------------------------------------------------------------------------------------------------------------------------------------------------------------------------------------------------------------------------------------------------------------------------------------------------------------------------------------------------------------------------------------------------------------------------------------------------------------------------------------------------------------------------------------------------------------------------------------------------------------------------------------------------------------------------------------------------------------------------------------------------------------------------------------------------------------------------------------------------------------------------------------------------------------------------------------------------------------------------------------------------------------------------------------------------------------------------------------------------------------------------------------------------------------------------------------------------------------------------------------------------------------------------------------------------------------------------------------------------------------------------------------------------------------------------------------------|---------|
| #9  | #8 NOT ([animals]/lim NOT [humans]/lim) AND [english]/lim NOT [conference abstract]/lim AND [1-1-1990]/sd                                                                                                                                                                                                                                                                                                                                                                                                                                                                                                                                                                                                                                                                                                                                                                                                                                                                                                                                                                                                                                                                                                                                                                                                                                                                                                                                                                                                                                                                                                                                                                                                          | 1939    |
| #8  | #6 AND #7                                                                                                                                                                                                                                                                                                                                                                                                                                                                                                                                                                                                                                                                                                                                                                                                                                                                                                                                                                                                                                                                                                                                                                                                                                                                                                                                                                                                                                                                                                                                                                                                                                                                                                          | 3615    |
| #7  | prognos*:ti OR predict*:ti OR correlat*:ti OR accuracy:ti OR accurate:ti OR utility:ti OR useful*:ti OR value*:ti OR evidence:ti OR assess*:ti OR level*:ti OR determin*:ti OR detect*:ti OR measure*:ti OR marker*:ti OR biomarker*:ti OR evaluat*:ti OR 'prognosis'/de OR 'prognostic factor'/de                                                                                                                                                                                                                                                                                                                                                                                                                                                                                                                                                                                                                                                                                                                                                                                                                                                                                                                                                                                                                                                                                                                                                                                                                                                                                                                                                                                                                 | 3903808 |
| #6  | #1 AND #4 AND #5                                                                                                                                                                                                                                                                                                                                                                                                                                                                                                                                                                                                                                                                                                                                                                                                                                                                                                                                                                                                                                                                                                                                                                                                                                                                                                                                                                                                                                                                                                                                                                                                                                                                                                   | 10546   |
| #5  | #2 OR #3                                                                                                                                                                                                                                                                                                                                                                                                                                                                                                                                                                                                                                                                                                                                                                                                                                                                                                                                                                                                                                                                                                                                                                                                                                                                                                                                                                                                                                                                                                                                                                                                                                                                                                           | 1093927 |
| #4  | 'mortality'/de OR 'in hospital mortality'/de OR 'survival'/de OR 'length of stay'/de OR mortality:ti OR surviv*:ti OR 'length of stay':ti,ab OR 'time spent in icu':ti,ab OR 'time spent in emergency':ti,ab OR 'on machine ventilation':ti,ab OR ((clinical* NEAR/3 outcome*):ti,ab)                                                                                                                                                                                                                                                                                                                                                                                                                                                                                                                                                                                                                                                                                                                                                                                                                                                                                                                                                                                                                                                                                                                                                                                                                                                                                                                                                                                                                              | 1379780 |
| #3  | 'sequential organ failure assessment score'/de OR 'sepsis-related organ failure assessment':ti,ab OR 'sequential organ failure assessment':ti,ab OR ((sofa NEAR/3 score*):ti,ab)                                                                                                                                                                                                                                                                                                                                                                                                                                                                                                                                                                                                                                                                                                                                                                                                                                                                                                                                                                                                                                                                                                                                                                                                                                                                                                                                                                                                                                                                                                                                   | 6437    |
| #2  | 'biological marker'/de OR 'interleukin 4'/de OR 'interleukin 6'/de OR 'interleukin 8'/de OR 'interleukin 10'/de OR 'interleukin 1 receptor blocking agent'/de OR 'advanced glycation end product receptor'/de OR 'monocyte chemotactic protein'/de OR 'monocyte chemotactic protein 1'/de OR 'high mobility group b1 protein'/de OR 'procalcitonin'/de OR 'c reactive protein'/de OR 'lactic acid'/de OR 'tumor necrosis factor'/de OR 'soluble triggering receptor expressed on myeloid cells 1'/de OR 'soluble urokinase type plasminogen activator receptor'/de OR 'angiopoietin 1'/de OR 'angiopoietin 2'/de OR biomarker*:ti,ab OR 'biological marker*:ti,ab OR (((interleukin OR il) NEAR/1 (4 OR 6 OR 8 OR 10 OR 'receptor antagonist*' OR 'blocking agent*')):ti,ab) OR 'advanced glycation endproduct receptor*:ti,ab OR 'advanced glycation end product receptor*:ti,ab OR 'receptor* for advanced glycation end products':ti,ab OR 'receptor* for advanced glycation end products':ti,ab OR rage:ti,ab OR 'monocyte chemoattractant protein*:ti,ab OR 'monocyte chemotactic protein*:ti,ab OR 'mcp-1':ti,ab OR (('high-mobility group' NEAR/1 (b1 OR 'box 1')):ti,ab) OR hmgb1:ti,ab OR procalcitonin:ti,ab OR 'c-reactive protein':ti,ab OR lactate:ti,ab OR 'lactic acid':ti,ab OR 'tumor necrosis factor alpha':ti,ab OR 'tnf-alpha':ti,ab OR 'tnf-α':ti,ab OR 'soluble triggering receptor expressed on myeloid cells-1':ti,ab OR strem1:ti,ab OR 'soluble urokinase-type plasminogen receptor':ti,ab OR 'soluble urokinase-type plasminogen activator receptor':ti,ab OR supar:ti,ab OR 'soluble upar':ti,ab OR 'angiopoietin 1':ti,ab OR 'angiopoietin 2':ti,ab OR 'ang-1':ti,ab OR 'ang-2':ti,ab | 1089482 |
| #1  | 'sepsis'/exp OR sepsis:ti OR septic:ti                                                                                                                                                                                                                                                                                                                                                                                                                                                                                                                                                                                                                                                                                                                                                                                                                                                                                                                                                                                                                                                                                                                                                                                                                                                                                                                                                                                                                                                                                                                                                                                                                                                                             | 230464  |

Search

Journals

Books

Multimedia

My Workspace

Mobile

## ▼ Search History (11)

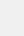

| # ▲ | Searches                                                                                                                                                                                                                                                                                                                                                                                                                                                                                                                                                                                                                                                                                                                                                                                                                                                                                                                                                                                                                                                                                                                                                                                                                                                                                                                                                                                                                                                                                     | Results | Type     | Actions                                                  | Annotations | Contract |
|-----|----------------------------------------------------------------------------------------------------------------------------------------------------------------------------------------------------------------------------------------------------------------------------------------------------------------------------------------------------------------------------------------------------------------------------------------------------------------------------------------------------------------------------------------------------------------------------------------------------------------------------------------------------------------------------------------------------------------------------------------------------------------------------------------------------------------------------------------------------------------------------------------------------------------------------------------------------------------------------------------------------------------------------------------------------------------------------------------------------------------------------------------------------------------------------------------------------------------------------------------------------------------------------------------------------------------------------------------------------------------------------------------------------------------------------------------------------------------------------------------------|---------|----------|----------------------------------------------------------|-------------|----------|
| 1   | exp Sepsis/ or sepsis.ti. or septic.ti.                                                                                                                                                                                                                                                                                                                                                                                                                                                                                                                                                                                                                                                                                                                                                                                                                                                                                                                                                                                                                                                                                                                                                                                                                                                                                                                                                                                                                                                      | 129370  | Advanced | <a href="#">Display Results</a>   <a href="#">More ▼</a> |             |          |
| 2   | Biomarkers/ or interleukin-4/ or interleukin-6/ or interleukin-8/ or interleukin-10/ or interleukin 1 receptor antagonist protein/ or Advanced Glycosylation End Product-Specific Receptor/ or Monocyte Chemoattractant Proteins/ or HMGB1 Protein/ or Calcitonin/ or C-Reactive Protein/ or Lactic Acid/ or Tumor Necrosis Factor-alpha/ or Receptors, Urokinase Plasminogen Activator/ or angiotensin-1/ or angiotensin-2/ or biomarker*.ti,ab. or biological marker*.ti,ab. or ((interleukin or il) adj1 ("4" or "6" or "8" or "10" or receptor antagonist* or blocking agent*)),ti,ab. or advanced glycation endproduct receptor*.ti,ab. or advanced glycation end product receptor*.ti,ab. or receptor* for advanced glycation endproducts.ti,ab. or receptor* for advanced glycation end products.ti,ab. or rage.ti,ab. or monocyte chemoattractant protein*.ti,ab. or monocyte chemotactic protein*.ti,ab. or mcp-1.ti,ab. or (high-mobility group adj1 (b1 or box 1)),ti,ab. or hmgb1.ti,ab. or procalcitonin.ti,ab. or c-reactive protein.ti,ab. or lactate.ti,ab. or lactic acid.ti,ab. or tumor necrosis factor alpha.ti,ab. or tnf-alpha.ti,ab. or soluble triggering receptor expressed on myeloid cells-1.ti,ab. or strem1.ti,ab. or soluble urokinase-type plasminogen receptor.ti,ab. or soluble urokinase-type plasminogen activator receptor.ti,ab. or super.ti,ab. or soluble upar.ti,ab. or angiotensin 1.ti,ab. or angiotensin 2.ti,ab. or ang-1.ti,ab. or ang-2.ti,ab. | 865780  | Advanced | <a href="#">Display Results</a>   <a href="#">More ▼</a> |             |          |
| 3   | (sepsis-related organ failure assessment or sequential organ failure assessment or (sofa adj3 score*)),ti,ab.                                                                                                                                                                                                                                                                                                                                                                                                                                                                                                                                                                                                                                                                                                                                                                                                                                                                                                                                                                                                                                                                                                                                                                                                                                                                                                                                                                                | 2945    | Advanced | <a href="#">Display Results</a>   <a href="#">More ▼</a> |             |          |
| 4   | Mortality/ or Hospital Mortality/ or Survival/ or Length of Stay/ or mortality.ti. or surviv*.ti. or length of stay.ti,ab. or time spent in icu.ti,ab. or time spent in emergency.ti,ab. or on machine ventilation.ti,ab. or (clinical* adj3 outcome*).ti,ab.                                                                                                                                                                                                                                                                                                                                                                                                                                                                                                                                                                                                                                                                                                                                                                                                                                                                                                                                                                                                                                                                                                                                                                                                                                | 561715  | Advanced | <a href="#">Display Results</a>   <a href="#">More ▼</a> |             |          |
| 5   | 2 or 3                                                                                                                                                                                                                                                                                                                                                                                                                                                                                                                                                                                                                                                                                                                                                                                                                                                                                                                                                                                                                                                                                                                                                                                                                                                                                                                                                                                                                                                                                       | 867750  | Advanced | <a href="#">Display Results</a>   <a href="#">More ▼</a> |             |          |
| 6   | 1 and 4 and 5                                                                                                                                                                                                                                                                                                                                                                                                                                                                                                                                                                                                                                                                                                                                                                                                                                                                                                                                                                                                                                                                                                                                                                                                                                                                                                                                                                                                                                                                                | 2262    | Advanced | <a href="#">Display Results</a>   <a href="#">More ▼</a> |             |          |
| 7   | (prognos* or predict* or correlat* or accuracy or accurate or utility or useful* or value* or evidence or assess* or level* or determin* or detect* or measure* or marker* or biomarker* or evaluat*).ti. or Prognosis/                                                                                                                                                                                                                                                                                                                                                                                                                                                                                                                                                                                                                                                                                                                                                                                                                                                                                                                                                                                                                                                                                                                                                                                                                                                                      | 3266048 | Advanced | <a href="#">Display Results</a>   <a href="#">More ▼</a> |             |          |
| 8   | 6 and 7                                                                                                                                                                                                                                                                                                                                                                                                                                                                                                                                                                                                                                                                                                                                                                                                                                                                                                                                                                                                                                                                                                                                                                                                                                                                                                                                                                                                                                                                                      | 906     | Advanced | <a href="#">Display Results</a>   <a href="#">More ▼</a> |             |          |
| 9   | 8 not (animals not humans).sh.                                                                                                                                                                                                                                                                                                                                                                                                                                                                                                                                                                                                                                                                                                                                                                                                                                                                                                                                                                                                                                                                                                                                                                                                                                                                                                                                                                                                                                                               | 867     | Advanced | <a href="#">Display Results</a>   <a href="#">More ▼</a> |             |          |
| 10  | limit 9 to english                                                                                                                                                                                                                                                                                                                                                                                                                                                                                                                                                                                                                                                                                                                                                                                                                                                                                                                                                                                                                                                                                                                                                                                                                                                                                                                                                                                                                                                                           | 819     | Advanced | <a href="#">Display Results</a>   <a href="#">More ▼</a> |             |          |
| 11  | limit 10 to yr="1990 -Current"                                                                                                                                                                                                                                                                                                                                                                                                                                                                                                                                                                                                                                                                                                                                                                                                                                                                                                                                                                                                                                                                                                                                                                                                                                                                                                                                                                                                                                                               | 815     | Advanced | <a href="#">Display Results</a>   <a href="#">More ▼</a> |             |          |

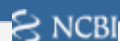

## PubMed Advanced Search Builder

YouTube Tutorial

Quoted phrase not found.

Use the builder below to create your search

[Edit](#)[Clear](#)

## Builder

All Fields

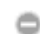[Show index list](#)

AND All Fields

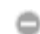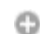[Show index list](#)or [Add to history](#)

## History

[Download history](#) [Clear history](#)

| Search             | Add to builder      | Query                                                                                                                                                                                                                                                                                                                                                                                                                                                                                                                                                                                                                                                                                                                                                                                                                                                                                                                                                                                                                                                                                                                                                                                                                                                                                                                                                                                                                                                                                                                                                                                                                                                                                                                                                                                                                                                                                                                                                                                                                                                                                                                                                                                                                                                                                                                                                                                                                                                                                                                                           | Items found        | Time     |
|--------------------|---------------------|-------------------------------------------------------------------------------------------------------------------------------------------------------------------------------------------------------------------------------------------------------------------------------------------------------------------------------------------------------------------------------------------------------------------------------------------------------------------------------------------------------------------------------------------------------------------------------------------------------------------------------------------------------------------------------------------------------------------------------------------------------------------------------------------------------------------------------------------------------------------------------------------------------------------------------------------------------------------------------------------------------------------------------------------------------------------------------------------------------------------------------------------------------------------------------------------------------------------------------------------------------------------------------------------------------------------------------------------------------------------------------------------------------------------------------------------------------------------------------------------------------------------------------------------------------------------------------------------------------------------------------------------------------------------------------------------------------------------------------------------------------------------------------------------------------------------------------------------------------------------------------------------------------------------------------------------------------------------------------------------------------------------------------------------------------------------------------------------------------------------------------------------------------------------------------------------------------------------------------------------------------------------------------------------------------------------------------------------------------------------------------------------------------------------------------------------------------------------------------------------------------------------------------------------------|--------------------|----------|
| <a href="#">#9</a> | <a href="#">Add</a> | Search (((((((((sepsis[Title] OR septic[Title])) AND (((((biomarker*[Title/Abstract] OR "biological marker*[Title/Abstract] OR ((interleukin[Title/Abstract] OR il)[Title/Abstract] AND (4[Title/Abstract] OR 6[Title/Abstract] OR 8[Title/Abstract] OR 10[Title/Abstract] OR "receptor antagonist*[Title/Abstract] OR "blocking agent*[Title/Abstract])) OR "advanced glycation endproduct receptor*[Title/Abstract] OR "advanced glycation end product receptor*[Title/Abstract] OR "receptor* for advanced glycation endproducts"[Title/Abstract] OR "receptor* for advanced glycation end products"[Title/Abstract] OR rage[Title/Abstract] OR "monocyte chemoattractant protein*[Title/Abstract] OR "monocyte chemotactic protein*[Title/Abstract] OR "mcp-1"[Title/Abstract] OR ((("high-mobility group"[Title/Abstract] AND (b1[Title/Abstract] OR "box 1"[Title/Abstract])) OR hmgb1[Title/Abstract] OR procalcitonin[Title/Abstract] OR "c-reactive protein"[Title/Abstract] OR lactate[Title/Abstract] OR "lactic acid"[Title/Abstract] OR "tumor necrosis factor alpha"[Title/Abstract] OR "tnf-alpha"[Title/Abstract] OR "soluble triggering receptor expressed on myeloid cells-1"[Title/Abstract] OR strem1[Title/Abstract] OR "soluble urokinase-type plasminogen receptor"[Title/Abstract] OR "soluble urokinase-type plasminogen activator receptor"[Title/Abstract] OR supar[Title/Abstract] OR "soluble upar"[Title/Abstract] OR "angiopoietin 1"[Title/Abstract] OR "angiopoietin 2"[Title/Abstract] OR "ang-1"[Title/Abstract] OR "ang-2"[Title/Abstract])))) OR ((("sepsis-related organ failure assessment"[Title/Abstract] OR "sequential organ failure assessment"[Title/Abstract] OR ((sofa[Title/Abstract] AND score*[Title/Abstract])))) AND ((mortality[Title] OR surviv*[Title])) OR ("length of stay"[Title/Abstract] OR "time spent in icu"[Title/Abstract] OR "time spent in emergency"[Title/Abstract] OR "on machine ventilation"[Title/Abstract] OR ((clinical*[Title/Abstract] AND outcome*[Title/Abstract])))) AND ((prognos*[Title] OR predict*[Title] OR correlat*[Title] OR accuracy[Title] OR accurate[Title] OR utility[Title] OR useful*[Title] OR value*[Title] OR evidence[Title] OR assess*[Title] OR level*[Title] OR determin*[Title] OR detect*[Title] OR measure*[Title] OR marker*[Title] OR biomarker*[Title] OR evaluat*[Title])))) NOT ((animals[mh] NOT humans[mh])) AND english[Language] AND (((inprocess[sb]) OR (publisher[sb] NOT pubstatusnihms NOT pubstatuspmcsd NOT pmcbook))) | <a href="#">54</a> | 09:35:21 |

|    |                     |                                                                                                                                                                                                                                                                                                                                                                                                                                                                                                                                                                                                                                                                                                                                                                                                                                                                                                                                                                                                                                                                                                                                                                                                                                                                                                                                                                                                                                                                                                                                                                                                                                                                                                                                                                                                                                                                                                                                                                                                                                                                                                                                                                                                                                                                                                                                                                                           |                                  |
|----|---------------------|-------------------------------------------------------------------------------------------------------------------------------------------------------------------------------------------------------------------------------------------------------------------------------------------------------------------------------------------------------------------------------------------------------------------------------------------------------------------------------------------------------------------------------------------------------------------------------------------------------------------------------------------------------------------------------------------------------------------------------------------------------------------------------------------------------------------------------------------------------------------------------------------------------------------------------------------------------------------------------------------------------------------------------------------------------------------------------------------------------------------------------------------------------------------------------------------------------------------------------------------------------------------------------------------------------------------------------------------------------------------------------------------------------------------------------------------------------------------------------------------------------------------------------------------------------------------------------------------------------------------------------------------------------------------------------------------------------------------------------------------------------------------------------------------------------------------------------------------------------------------------------------------------------------------------------------------------------------------------------------------------------------------------------------------------------------------------------------------------------------------------------------------------------------------------------------------------------------------------------------------------------------------------------------------------------------------------------------------------------------------------------------------|----------------------------------|
| #8 | <a href="#">Add</a> | Search ((((((sepsis[Title] OR septic[Title]))) AND (((((biomarker*[Title/Abstract] OR "biological marker"[Title/Abstract] OR (((interleukin[Title/Abstract] OR il)[Title/Abstract] AND (4[Title/Abstract] OR 6[Title/Abstract] OR 8[Title/Abstract] OR 10[Title/Abstract] OR "receptor antagonist"[Title/Abstract] OR "blocking agent"[Title/Abstract]))) OR "advanced glycation endproduct receptor"[Title/Abstract] OR "advanced glycation end product receptor"[Title/Abstract] OR "receptor* for advanced glycation endproducts"[Title/Abstract] OR "receptor* for advanced glycation end products"[Title/Abstract] OR rage[Title/Abstract] OR "monocyte chemoattractant protein"[Title/Abstract] OR "monocyte chemotactic protein"[Title/Abstract] OR "mcp-1"[Title/Abstract] OR (((high-mobility group"[Title/Abstract] AND (b1[Title/Abstract] OR "box 1"[Title/Abstract]))) OR hmgb1[Title/Abstract] OR procalcitonin[Title/Abstract] OR "c-reactive protein"[Title/Abstract] OR lactate[Title/Abstract] OR "lactic acid"[Title/Abstract] OR "tumor necrosis factor alpha"[Title/Abstract] OR "tnf-alpha"[Title/Abstract] OR "soluble triggering receptor expressed on myeloid cells-1"[Title/Abstract] OR strem1[Title/Abstract] OR "soluble urokinase-type plasminogen receptor"[Title/Abstract] OR "soluble urokinase-type plasminogen activator receptor"[Title/Abstract] OR supar[Title/Abstract] OR "soluble upar"[Title/Abstract] OR "angiopoietin 1"[Title/Abstract] OR "angiopoietin 2"[Title/Abstract] OR "ang-1"[Title/Abstract] OR "ang-2"[Title/Abstract]))) OR ((("sepsis-related organ failure assessment"[Title/Abstract] OR "sequential organ failure assessment"[Title/Abstract] OR ((sofa[Title/Abstract] AND score*[Title/Abstract])))) AND (((mortality[Title] OR surviv*[Title])) OR ("length of stay"[Title/Abstract] OR "time spent in icu"[Title/Abstract] OR "time spent in emergency"[Title/Abstract] OR "on machine ventilation"[Title/Abstract] OR ((clinical*[Title/Abstract] AND outcome*[Title/Abstract])))) AND ((prognos*[Title] OR predict*[Title] OR correlat*[Title] OR accuracy[Title] OR accurate[Title] OR utility[Title] OR useful*[Title] OR value*[Title] OR evidence[Title] OR assess*[Title] OR level*[Title] OR determin*[Title] OR detect*[Title] OR measure*[Title] OR marker*[Title] OR biomarker*[Title] OR evaluat*[Title])))) | <a href="#">568</a> 09:33:20     |
| #7 | <a href="#">Add</a> | Search (((((biomarker*[Title/Abstract] OR "biological marker"[Title/Abstract] OR (((interleukin[Title/Abstract] OR il)[Title/Abstract] AND (4[Title/Abstract] OR 6[Title/Abstract] OR 8[Title/Abstract] OR 10[Title/Abstract] OR "receptor antagonist"[Title/Abstract] OR "blocking agent"[Title/Abstract]))) OR "advanced glycation endproduct receptor"[Title/Abstract] OR "advanced glycation end product receptor"[Title/Abstract] OR "receptor* for advanced glycation endproducts"[Title/Abstract] OR "receptor* for advanced glycation end products"[Title/Abstract] OR rage[Title/Abstract] OR "monocyte chemoattractant protein"[Title/Abstract] OR "monocyte chemotactic protein"[Title/Abstract] OR "mcp-1"[Title/Abstract] OR (((high-mobility group"[Title/Abstract] AND (b1[Title/Abstract] OR "box 1"[Title/Abstract]))) OR hmgb1[Title/Abstract] OR procalcitonin[Title/Abstract] OR "c-reactive protein"[Title/Abstract] OR lactate[Title/Abstract] OR "lactic acid"[Title/Abstract] OR "tumor necrosis factor alpha"[Title/Abstract] OR "tnf-alpha"[Title/Abstract] OR "soluble triggering receptor expressed on myeloid cells-1"[Title/Abstract] OR strem1[Title/Abstract] OR "soluble urokinase-type plasminogen receptor"[Title/Abstract] OR "soluble urokinase-type plasminogen activator receptor"[Title/Abstract] OR supar[Title/Abstract] OR "soluble upar"[Title/Abstract] OR "angiopoietin 1"[Title/Abstract] OR "angiopoietin 2"[Title/Abstract] OR "ang-1"[Title/Abstract] OR "ang-2"[Title/Abstract]))) OR ((("sepsis-related organ failure assessment"[Title/Abstract] OR "sequential organ failure assessment"[Title/Abstract] OR ((sofa[Title/Abstract] AND score*[Title/Abstract]))))                                                                                                                                                                                                                                                                                                                                                                                                                                                                                                                                                                                                                                                                   | <a href="#">497763</a> 09:32:47  |
| #6 | <a href="#">Add</a> | Search (prognos*[Title] OR predict*[Title] OR correlat*[Title] OR accuracy[Title] OR accurate[Title] OR utility[Title] OR useful*[Title] OR value*[Title] OR evidence[Title] OR assess*[Title] OR level*[Title] OR determin*[Title] OR detect*[Title] OR measure*[Title] OR marker*[Title] OR biomarker*[Title] OR evaluat*[Title])                                                                                                                                                                                                                                                                                                                                                                                                                                                                                                                                                                                                                                                                                                                                                                                                                                                                                                                                                                                                                                                                                                                                                                                                                                                                                                                                                                                                                                                                                                                                                                                                                                                                                                                                                                                                                                                                                                                                                                                                                                                       | <a href="#">2858431</a> 09:10:30 |
| #5 | <a href="#">Add</a> | Search ((mortality[Title] OR surviv*[Title])) OR ("length of stay"[Title/Abstract] OR "time spent in icu"[Title/Abstract] OR "time spent in emergency"[Title/Abstract] OR "on machine ventilation"[Title/Abstract] OR ((clinical*[Title/Abstract] AND outcome*[Title/Abstract])))                                                                                                                                                                                                                                                                                                                                                                                                                                                                                                                                                                                                                                                                                                                                                                                                                                                                                                                                                                                                                                                                                                                                                                                                                                                                                                                                                                                                                                                                                                                                                                                                                                                                                                                                                                                                                                                                                                                                                                                                                                                                                                         | <a href="#">780175</a> 09:08:10  |

|                    |                     |                                                                                                                                                                                                                                                                                                                                                                                                                                                                                                                                                                                                                                                                                                                                                                                                                                                                                                                                                                                                                                                                                                                                                                                                                                                                                                                                                                                                                                                                                                                                    |                        |          |
|--------------------|---------------------|------------------------------------------------------------------------------------------------------------------------------------------------------------------------------------------------------------------------------------------------------------------------------------------------------------------------------------------------------------------------------------------------------------------------------------------------------------------------------------------------------------------------------------------------------------------------------------------------------------------------------------------------------------------------------------------------------------------------------------------------------------------------------------------------------------------------------------------------------------------------------------------------------------------------------------------------------------------------------------------------------------------------------------------------------------------------------------------------------------------------------------------------------------------------------------------------------------------------------------------------------------------------------------------------------------------------------------------------------------------------------------------------------------------------------------------------------------------------------------------------------------------------------------|------------------------|----------|
| <a href="#">#4</a> | <a href="#">Add</a> | Search ((biomarker*[Title/Abstract] OR "biological marker"[Title/Abstract] OR (((interleukin[Title/Abstract] OR il)[Title/Abstract] AND (4[Title/Abstract] OR 6[Title/Abstract] OR 8[Title/Abstract] OR 10[Title/Abstract] OR "receptor antagonist"[Title/Abstract] OR "blocking agent"[Title/Abstract]))) OR "advanced glycation endproduct receptor"[Title/Abstract] OR "advanced glycation end product receptor"[Title/Abstract] OR "receptor* for advanced glycation endproducts"[Title/Abstract] OR "receptor* for advanced glycation end products"[Title/Abstract] OR rage[Title/Abstract] OR "monocyte chemoattractant protein"[Title/Abstract] OR "monocyte chemotactic protein"[Title/Abstract] OR "mcp-1"[Title/Abstract] OR ((("high-mobility group"[Title/Abstract] AND (b1[Title/Abstract] OR "box 1"[Title/Abstract]))) OR hmgb1[Title/Abstract] OR procalcitonin[Title/Abstract] OR "c-reactive protein"[Title/Abstract] OR lactate[Title/Abstract] OR "lactic acid"[Title/Abstract] OR "tumor necrosis factor alpha"[Title/Abstract] OR "tnf-alpha"[Title/Abstract] OR "soluble triggering receptor expressed on myeloid cells-1"[Title/Abstract] OR strem1[Title/Abstract] OR "soluble urokinase-type plasminogen receptor"[Title/Abstract] OR "soluble urokinase-type plasminogen activator receptor"[Title/Abstract] OR supar[Title/Abstract] OR "soluble upar"[Title/Abstract] OR "angiopoietin 1"[Title/Abstract] OR "angiopoietin 2"[Title/Abstract] OR "ang-1"[Title/Abstract] OR "ang-2"[Title/Abstract])) | <a href="#">495700</a> | 09:04:50 |
| <a href="#">#3</a> | <a href="#">Add</a> | Search ("sepsis-related organ failure assessment"[Title/Abstract] OR "sequential organ failure assessment"[Title/Abstract] OR ((sofa[Title/Abstract] AND score*[Title/Abstract])))                                                                                                                                                                                                                                                                                                                                                                                                                                                                                                                                                                                                                                                                                                                                                                                                                                                                                                                                                                                                                                                                                                                                                                                                                                                                                                                                                 | <a href="#">2843</a>   | 09:02:02 |
| <a href="#">#1</a> | <a href="#">Add</a> | Search (sepsis[Title] OR septic[Title])                                                                                                                                                                                                                                                                                                                                                                                                                                                                                                                                                                                                                                                                                                                                                                                                                                                                                                                                                                                                                                                                                                                                                                                                                                                                                                                                                                                                                                                                                            | <a href="#">40873</a>  | 08:59:31 |

You are here: [NCBI](#) > [Literature](#) > [PubMed](#)[Support Center](#)**GETTING STARTED**

[NCBI Education](#)  
[NCBI Help Manual](#)  
[NCBI Handbook](#)  
[Training & Tutorials](#)  
[Submit Data](#)

**RESOURCES**

[Chemicals & Bioassays](#)  
[Data & Software](#)  
[DNA & RNA](#)  
[Domains & Structures](#)  
[Genes & Expression](#)  
[Genetics & Medicine](#)  
[Genomes & Maps](#)  
[Homology](#)  
[Literature](#)  
[Proteins](#)  
[Sequence Analysis](#)  
[Taxonomy](#)  
[Variation](#)

**POPULAR**

[PubMed](#)  
[Bookshelf](#)  
[PubMed Central](#)  
[PubMed Health](#)  
[BLAST](#)  
[Nucleotide](#)  
[Genome](#)  
[SNP](#)  
[Gene](#)  
[Protein](#)  
[PubChem](#)

**FEATURED**

[Genetic Testing Registry](#)  
[PubMed Health](#)  
[GenBank](#)  
[Reference Sequences](#)  
[Gene Expression Omnibus](#)  
[Map Viewer](#)  
[Human Genome](#)  
[Mouse Genome](#)  
[Influenza Virus](#)  
[Primer-BLAST](#)  
[Sequence Read Archive](#)

**NCBI INFORMATION**

[About NCBI](#)  
[Research at NCBI](#)  
[NCBI News & Blog](#)  
[NCBI FTP Site](#)  
[NCBI on Facebook](#)  
[NCBI on Twitter](#)  
[NCBI on YouTube](#)

National Center for Biotechnology Information, U.S. National Library of Medicine  
 8600 Rockville Pike, Bethesda MD, 20894 USA

[Policies and Guidelines](#) | [Contact](#)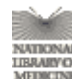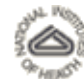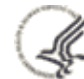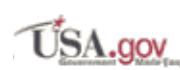

Supplement: MOESM1 [file 17367426]
